# Supplementary material
Source: publisher figshare collection journal article supplement (https://karger.figshare.com/ndownloader/files/24989570)
Supplement: Supplementary file 1 [file 24989570]

**Table S3. Adjusted R2 of Multiple Regression Models for eGFR change**

| Model | Covariables | Adjusted R2 | Adjusted R2 change |
| --- | --- | --- | --- |
| 1 | Baseline eGFR | 0.0007 |  |
| 2 | Model 1+mean systolic BP | 0.05 | 0.0493 |
| 3 | Model 2+SD of systolic BP | 0.07 | 0.02 |
| 4 | Model 3+diuretics | 0.10 | 0.03 |
| 5 | Model 4+diabetes | 0.11 | 0.01 |

BP, blood pressure; eGFR, estimated glomerular filtration rate; SD, standard deviation
